# Supplementary material for: MEK/ERK‐mediated oncogenic signals promote secretion of extracellular vesicles by controlling lysosome function
Source: PubMed Central journal article supplement — Cancer Sci. 2022 Feb 13;113(4):1264–76. doi: 10.1111/cas.15288 (PMC8990735; doi:10.1111/cas.15288), 2022-02-13
Supplement: CAS-113-1264-s001.pdf [file CAS-113-1264-s001.pdf]

## **Supplementary Information**

MEK/ERK-mediated oncogenic signals promote secretion of extracellular vesicles by controlling lysosome function

Tomoya Hikita, Ryo Uehara, Reina E. Itoh, Fumie Mitani, Mamiko Miyata, Takuya Yoshida, Rui Yamaguchi & Chitose Oneyama

Corresponding author: Chitose Oneyama

Email: [coneyama@aichi-cc.jp](mailto:coneyama@aichi-cc.jp)

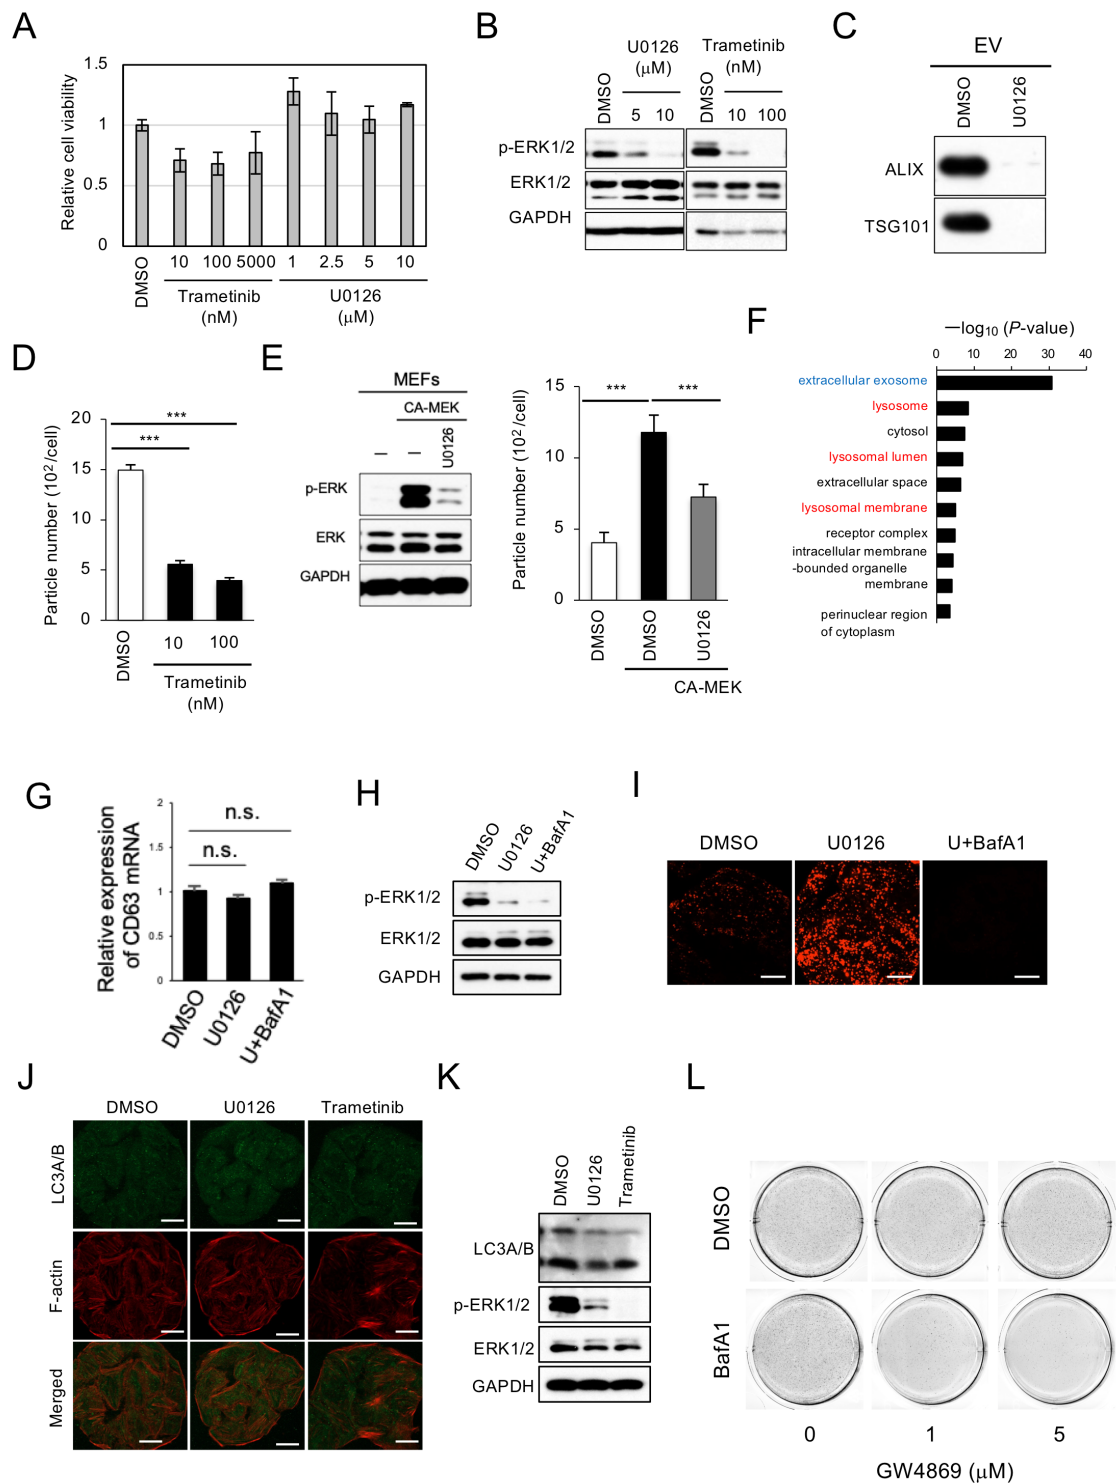

**Fig. S1. MEK/ERK activation increases EV secretion.** (A) Cell viability of HT29/CD63Nluc cells at different concentrations of trametinib or U0126. (B) Total cell lysates from HT29/CD63Nluc cells treated with U0126 or trametinib for 24 h at the indicated concentrations were immunoblotted with the indicated antibodies. (C) EV lysates from HT29/CD63Nluc cells treated with or without U0126

(10  $\mu$ M) were immunoblotted with the indicated exosome markers. **(D)** HT29 cells treated with trametinib at the indicated concentrations were examined by NTA for quantification of isolated EV particles. **(E)** MEFs expressing constitutively active MEK (CA-MEK) were treated with or without U0126 (10  $\mu$ M) for 24 h, and whole-cell lysates were immunoblotted with the indicated antibodies (left panels). NTA for the quantitative measurement of isolated EVs from each MEF line (right panel). **(F)** Gene Ontology analysis of >2-fold ( $\log_2$ FC = 1.0) upregulated genes in U0126-treated as compared with DMSO-treated HT29 cells (GSE18232). The analysis was performed using the DAVID bioinformatics tool. **(G)** Expression of *CD63* in HT29 cells treated with DMSO, 10  $\mu$ M U0126, and 50 nM BafA1, respectively, for 24 h. **(H)** Total cell lysates from HT29 cells treated with DMSO or 10  $\mu$ M U0126 and 50 nM BafA1 for 24 h were immunoblotted with the indicated antibodies. **(I)** LysoTracker Red staining of the HT29 cells indicated in (H). **(J)** LC3 immunostaining of HT29 cells treated with DMSO, U0126 (10  $\mu$ M), or trametinib (100 nM) for 24 h. **(K)** Total cell lysates from cells indicated in (J) were immunoblotted with the indicated antibodies. **(L)** HT29 cells treated with DMSO or 1 nM BafA1 and/or GW4869 (GW; 1 or 5  $\mu$ M) were used for the soft-agar colony formation assay. Representative dishes are shown. Scale bar = 10  $\mu$ m. Data represent the mean  $\pm$  standard deviation of three independent measurements. Statistical analysis was performed using one-way ANOVA test. \* $P$  < 0.05, \*\*\*  $P$  < 0.001; *n.s.*, not significant.

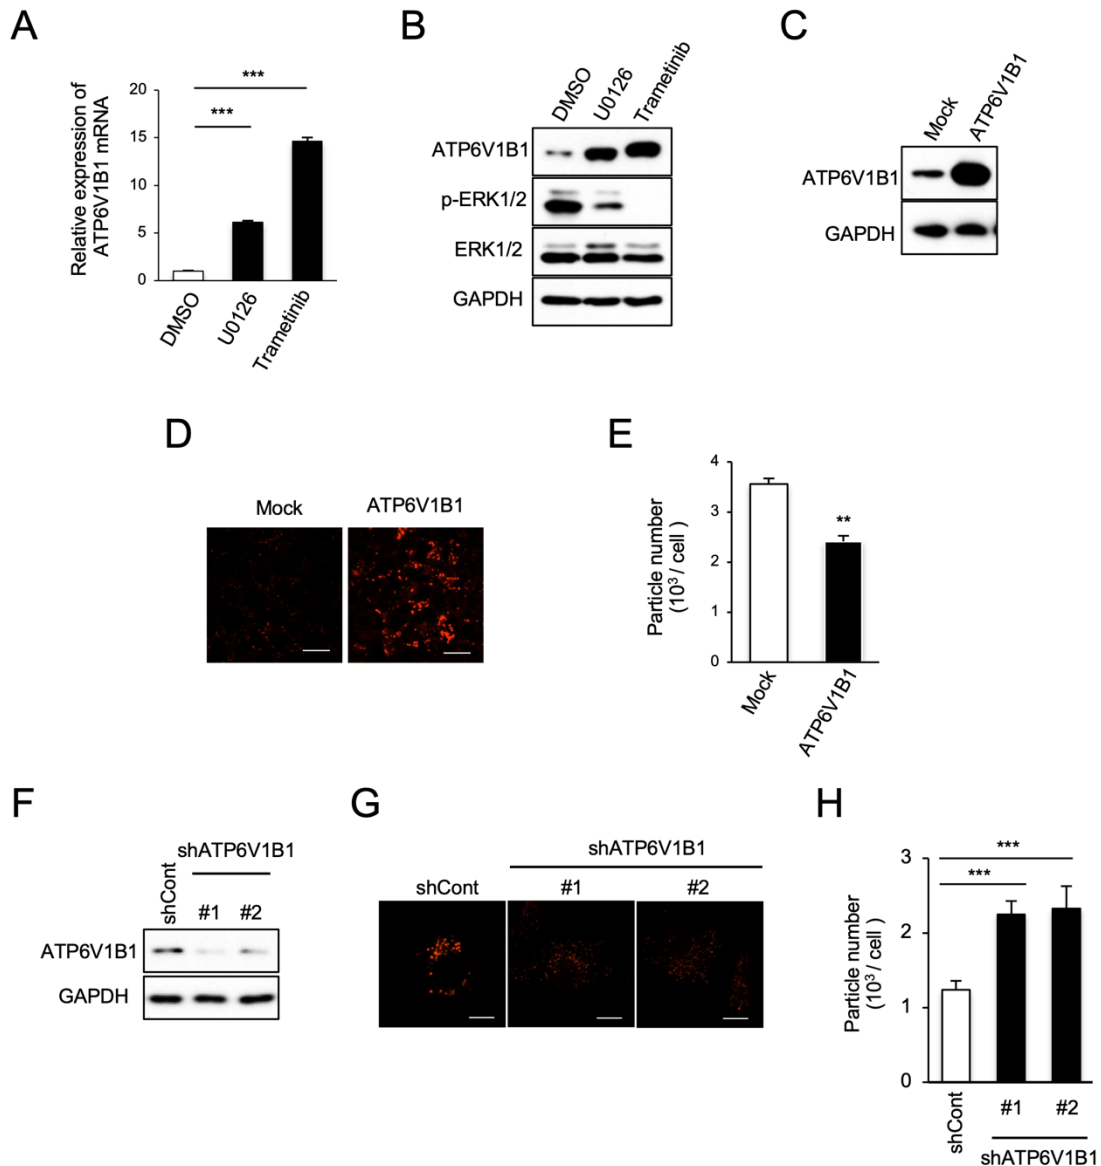

**Fig. S2. MEK/ERK suppression promotes lysosomal acidification.** (A) Expression analysis of *ATP6V1B1* in HT29 cells treated with DMSO, U0126 (10  $\mu$ M), or trametinib (100 nM) for 24 h. (B) Total cell lysates from HT29 cells treated with DMSO, 10  $\mu$ M U0126, or 100 nM trametinib for 24 h were immunoblotted with the indicated antibodies. (C) HT29 cells expressing mock or *ATP6V1B1* were immunoblotted with the indicated antibodies. (D) HT29 cells used in (C) were subjected to staining by Lysotracker Red DND-99. (E) NTA for the quantitative measurement of particles isolated from cells indicated in (C). (F) Total cell lysates from MEFs transfected with *ATP6V1B1* shRNA were immunoblotted with anti-*ATP6V1B1*. (G) The cells indicated in (F) were subjected to Lysotracker Red staining. (H) NTA for the quantitative measurement of isolated particles from the cells indicated in (F). Scale bar = 10  $\mu$ m (D, G). Data represent the mean  $\pm$

standard deviation of three independent measurements. Statistical analysis was performed using one-way ANOVA.  $**P < 0.01$ ,  $***P < 0.001$ .

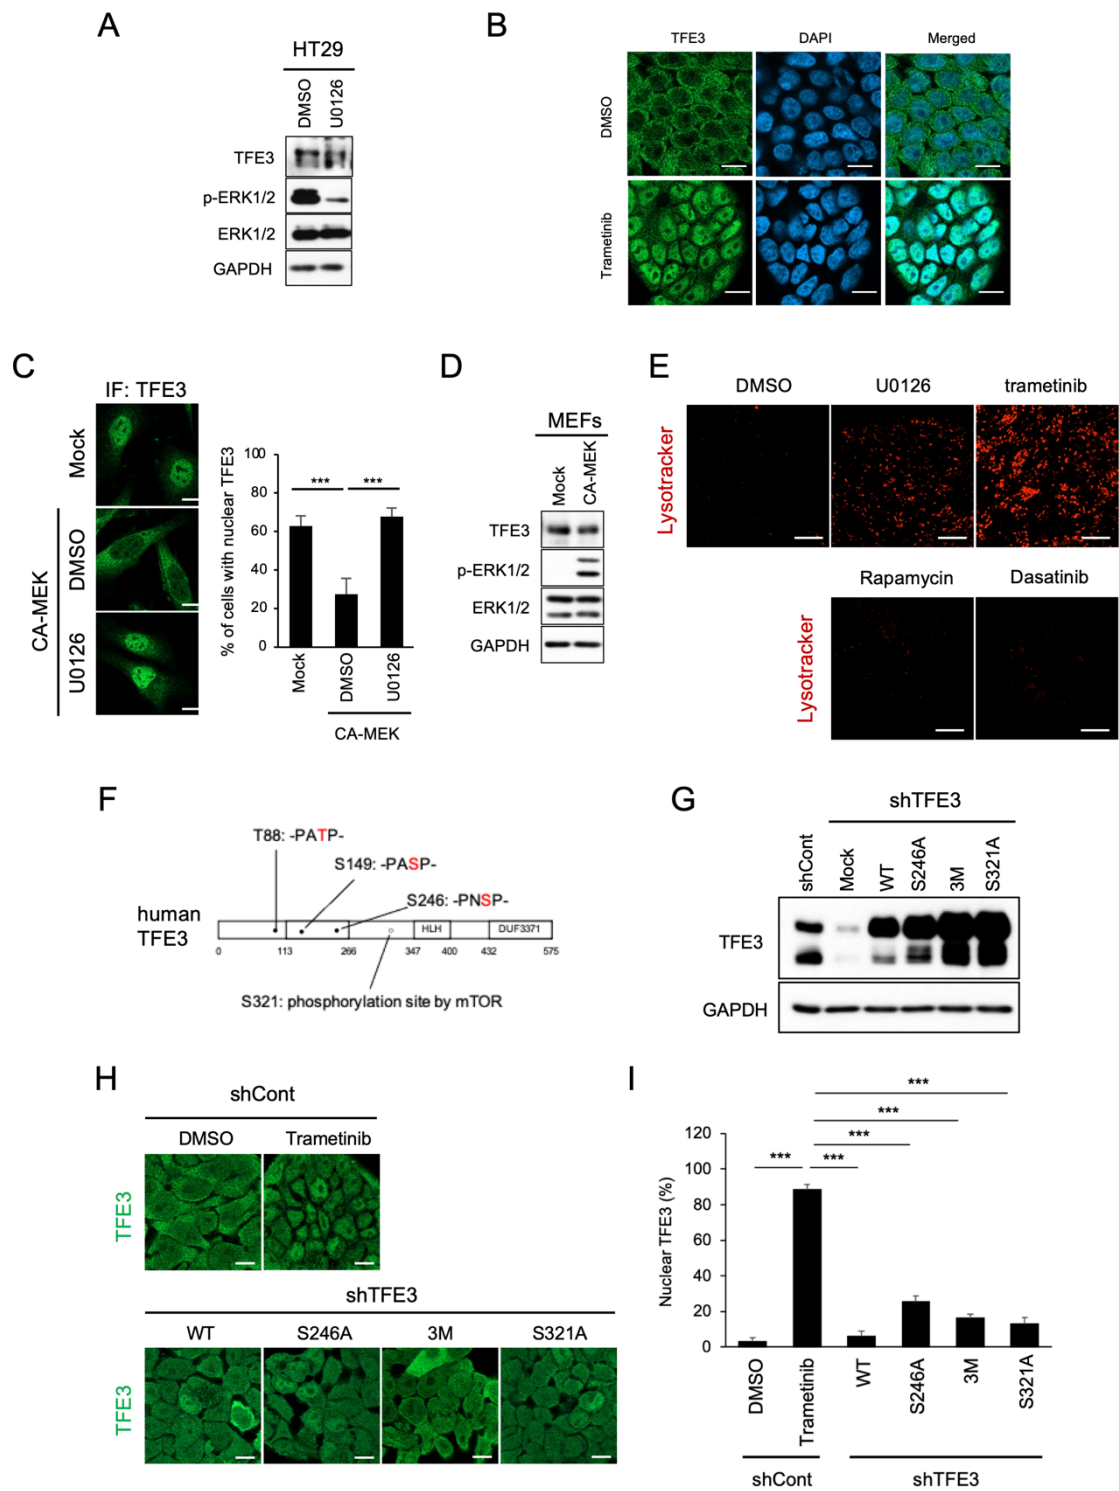

**Fig S3. Nuclear localization of TFE3 by MEK/ERK inactivation.** (A) Total cell lysates from HT29 cells treated with DMSO or U0126 (10  $\mu$ M) for 24 h were immunoblotted with the indicated

antibodies. **(B)** TFE3 immunostaining and nuclear staining with 4',6-diamidino-2-phenylindole (DAPI) of HT29 cells treated with DMSO or trametinib (100 nM) for 24 h. **(C)** TFE3 immunostaining of parental and MEK-transformed (CA-MEK) MEFs treated with DMSO and U0126 (10  $\mu$ M), respectively, for 24 h (left panels). Quantification of the ratio (%) of cells with nuclear localization of TFE3 (n > 150 cells, pooled from three independent experiments). **(D)** Cell lysates from MEFs expressing mock or CA-MEK were immunoblotted with the indicated antibodies. **(E)** LysoTracker Red staining of HT29 cells treated with DMSO, U0126 (10  $\mu$ M), trametinib (100 nM), rapamycin (200 nM), or dasatinib (50 nM) for 24 h. **(F)** Sequences of ERK substrate motif in human TFE3. **(G)** The indicated shRNA-resistant TFE3 mutants were expressed in HT29 cells transfected with *TFE3* shRNA. 3M: T88A/S149A/S246A. Total cell lysates were subjected to immunoblotting with the indicated antibodies. **(H)** TFE3 immunostaining of the HT29 cells indicated in (G). **(I)** Quantification of the ratio (%) of cells with nuclear localization of TFE3 (n > 50 cells, pooled from three independent experiments). Scale bar = 10  $\mu$ m (B, C, E, H). Data represent the mean  $\pm$  standard deviation of three independent measurements. Statistical analysis was performed using one-way ANOVA test. \*\*\* $P$  < 0.001.

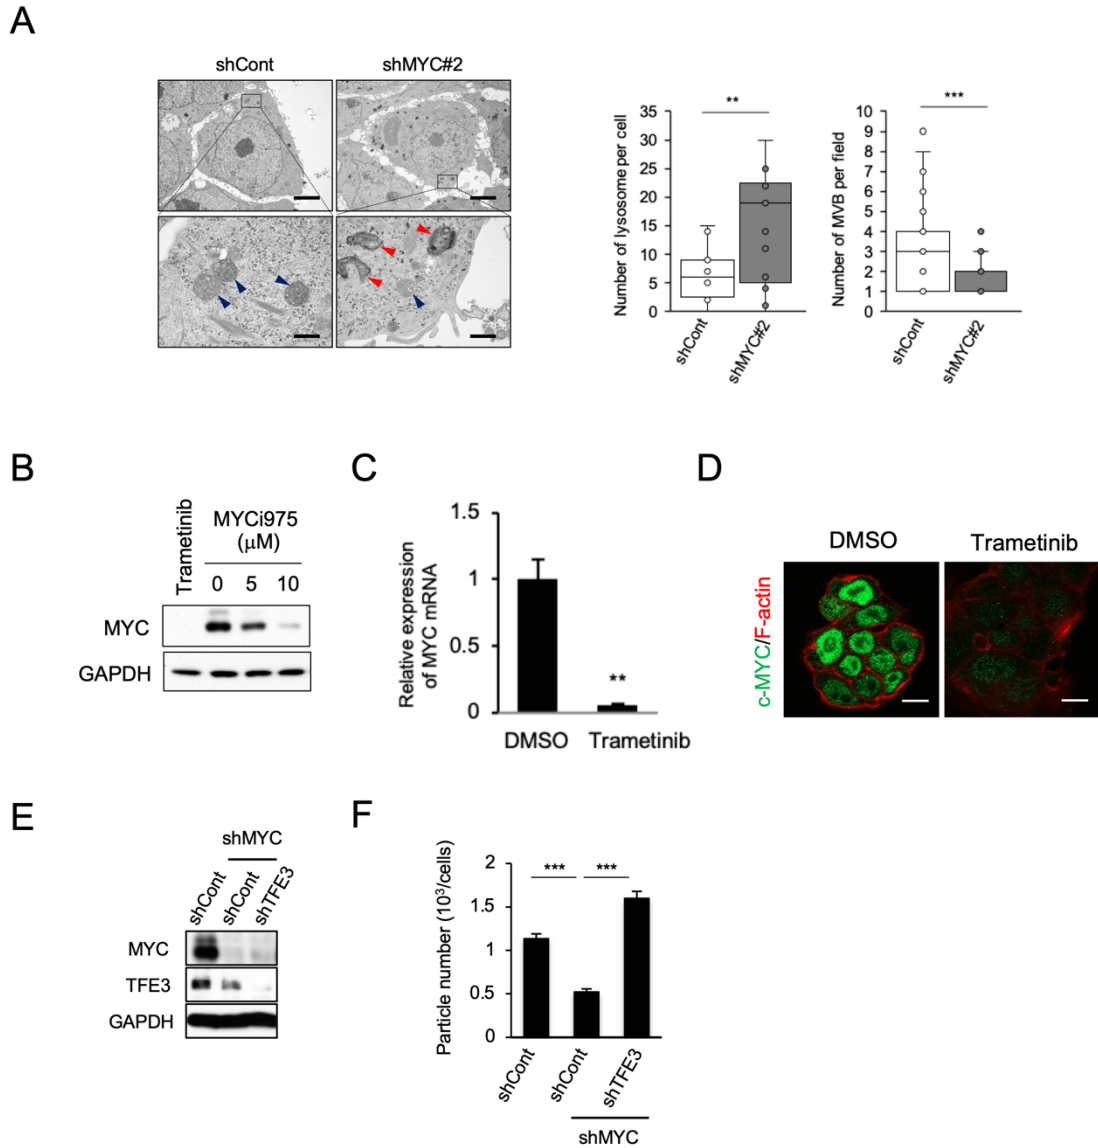

**Fig. S4. MYC downregulation activates lysosome function.** (A) Electron microscopy images of MVBs (blue arrowheads) and lysosomes (red arrowheads) in HT29 cells expressing control (shCont) or MYC (shMYC) shRNAs. Scale bar = 5  $\mu\text{m}$  (upper panels). Boxed areas with dotted line are enlarged in the lower panels (scale bar = 500 nm). Quantification of the number of lysosomes per cell ( $n = 13$ ) and MVBs in >20 fields per condition. Boxes represent the interquartile range, and the line inside the box represents the median value. (B) Cell lysates from HT29 cells treated with different concentrations of trametinib (100 nM) or MYC inhibitor (MYCi975) for 24 h were immunoblotted with the indicated antibodies. (C) Real-time qRT-PCR analysis of MYC in HT29 cells treated with or without trametinib (100 nM) for 24 h. (D) Intracellular localization of c-MYC (green) in HT29 cells treated with or without trametinib (100 nM) for 24 h were analyzed by immunostaining. Actin filaments were visualized by Alexa 594-phalloidin staining (red). Scale bar



= 10  $\mu$ m. (**E**) Total cell lysates from HT29 cells transfected with shRNA were immunoblotted with the indicated antibodies. (**F**) NTA for the quantitative measurement of isolated particles from the cells indicated in (E). Data represent the mean  $\pm$  standard deviation of three independent measurements. Statistical analysis was performed using one-way ANOVA. \*\* $P$  < 0.01, \*\*\* $P$  < 0.001.



myeloid leukemia; LGG, brain lower grade glioma; LIHC, liver hepatocellular carcinoma; LUAD, lung adenocarcinoma; LUSC, lung squamous cell carcinoma; MESO, mesothelioma; OV, ovarian serous cystadenocarcinoma; PAAD, pancreatic adenocarcinoma; PCPG, pheochromocytoma and paraganglioma; PRAD, prostate adenocarcinoma; READ, rectum adenocarcinoma; SARC, sarcoma; SKCM, skin cutaneous melanoma; STAD, stomach adenocarcinoma; STES, stomach and esophageal carcinoma; TGCT, testicular germ cell tumors; THCA, thyroid carcinoma; THYM, thymoma; UCEC, uterine corpus endometrial carcinoma; UCSU, uterine carcinosarcoma; UVMU, uveal melanoma. *MYC* and *ATP6V1B1* expression in renal cell carcinoma tissue as compared with that in normal kidney tissues according to re-analysis of (C) GSE781, (D) GSE6344, and (E) GSE36895. Boxes represent the interquartile range, and the line inside the box represents the median value. Statistical analysis was performed using one-way ANOVA test. \* $P < 0.05$ , \*\* $P < 0.01$ , \*\*\* $P < 0.001$ .

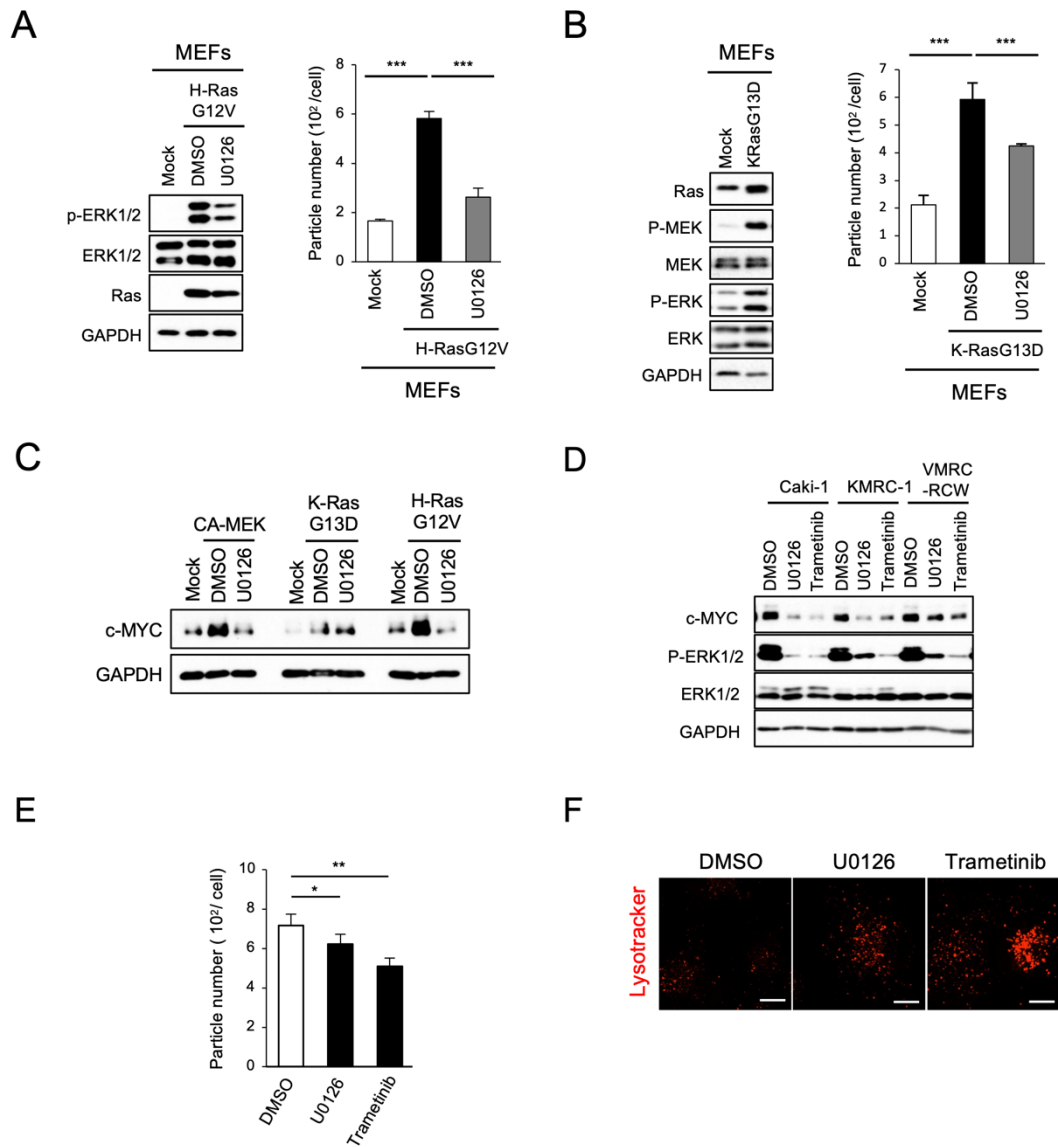

**Fig. S6. MEK inactivation induces downregulation of MYC and EV secretion.** MEFs expressing gain-of-function mutants of (A) H-Ras (G12V) and (B) K-Ras (G13D) were treated with or without U0126 (10  $\mu$ M) for 24 h, and whole-cell lysates were immunoblotted with the indicated antibodies (left panels). NTA for the quantitative measurement of EVs isolated from each MEF line (right panel). (C) MEFs expressing constitutively active MEK (CA-MEK) or gain-of-function mutants of H-Ras (G12V) and K-Ras (G13D) were treated with or without U0126 (10  $\mu$ M) for 24 h, and whole-cell lysates were immunoblotted with the indicated antibodies. (D) RCC cells (Caki-1, KMRC-1, and VMRC-RCW) were treated with DMSO, U0126 (10  $\mu$ M), or trametinib (100 nM) for 24 h and subjected to immunoblotting with the indicated antibodies. (E) Caki-1 cells indicated in (D) were subjected to exosome preparation, followed by NTA for the quantification of isolated particles. (F) Lysotracker Red staining of the Caki-1 cells indicated in (D). Scale bar = 10

$\mu\text{m}$ . Data represent the mean  $\pm$  standard deviation. Statistical analysis was performed using one-way ANOVA test. \* $P < 0.05$ , \*\* $P < 0.01$ , \*\*\* $P < 0.001$ .

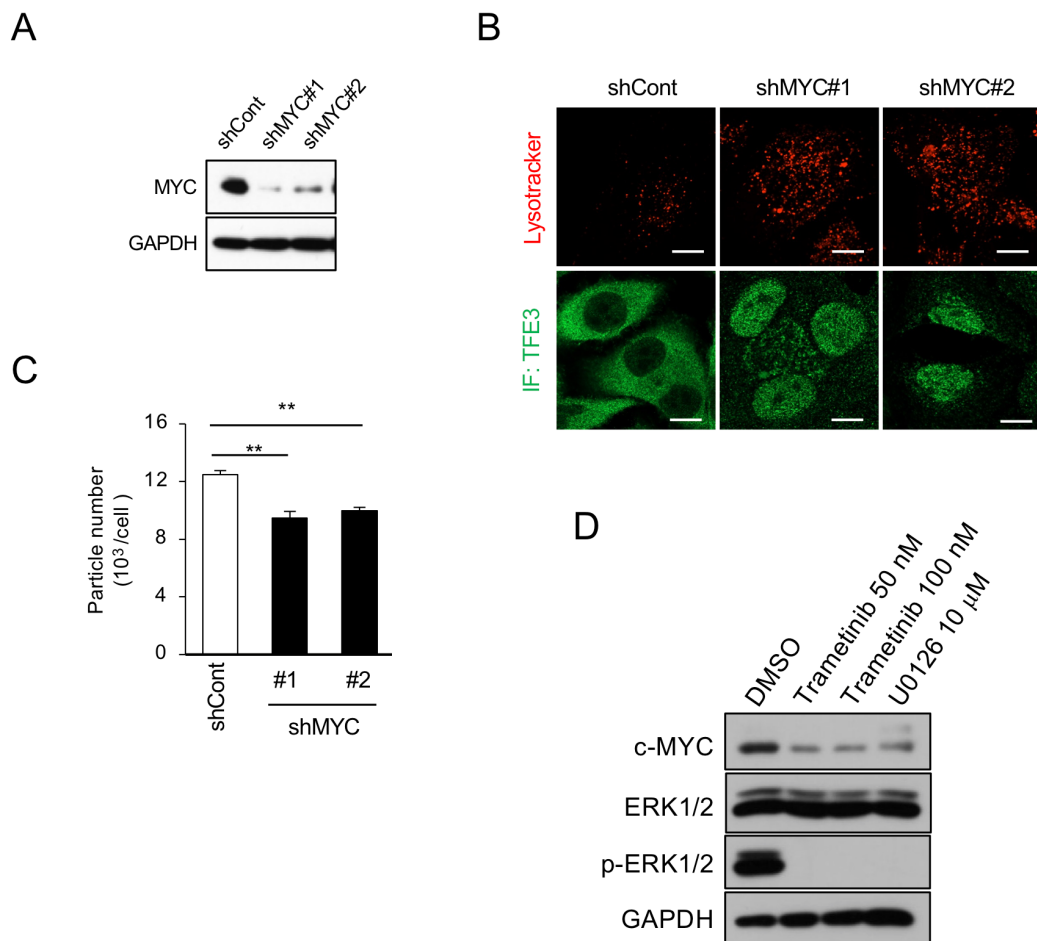

**Fig. S7. Disruption of *MYC* expression suppresses EV secretion by activating lysosome function in prostate cancer cells.** (A) Cell lysates from PC3 prostate cancer cells expressing control (shCont) or *MYC* (shMYC) shRNAs were immunoblotted with the indicated antibodies. (B) Cells indicated in (A) were stained with Lysotracker Red or for anti-TFE3 (green). Scale bar = 10 μm. (C) NTA of the isolated particles was performed in the cells indicated in (A). (D) MDA-MB-231 cells were treated with DMSO, U0126 (10 μM), or trametinib (50 or 100 nM) for 24 h and subjected to immunoblotting with the indicated antibodies. Data represent the mean ± standard deviation of three independent measurements. Statistical analysis was performed using one-way ANOVA test. \*\* $P < 0.01$ .

**Table S1.** Primers used in this study

| Target gene              |   | Sequence                |
|--------------------------|---|-------------------------|
| <i>CD63</i>              | F | TAAGGAGGGCTGTGTGGAGAA   |
| <i>CD63</i>              | R | AGGCAGCAGGCAAAGACAA     |
| <i>MYC</i>               | F | CCTCGGATTCTCTGCTCTCCT   |
| <i>MYC</i>               | R | TTCTCATCTTCTTGTTCCTCCTC |
| Lysosomal enzyme (Human) |   |                         |
| <i>GAA</i>               | F | AGATTGTAAGGTTTGCCTCCTC  |
| <i>GAA</i>               | R | CATACCCACACCTCCACCT     |
| <i>CTSS</i>              | F | GAAGAGAGCCCACTAATCAAGGA |
| <i>CTSS</i>              | R | AGGAGCACACCAAGAGCACA    |
| <i>ARSA</i>              | F | GAATGAGGAACTGAGGTGCAGA  |
| <i>ARSA</i>              | R | TCAAATCCCAGCCCAACC      |
| <i>TPP1</i>              | F | TGAAATGCTGTGAGCTTGACTTG |
| <i>TPP1</i>              | R | AGATGAGATGCGGAGGGAGA    |
| <i>FUCA1</i>             | F | ACGACAAAGCATCACGAAGG    |
| <i>FUCA1</i>             | R | AGAGCTGTTCCCAATTCACCA   |
| <i>MAN2B2</i>            | F | AGGCTAATGGCAGGAAATGGT   |
| <i>MAN2B2</i>            | R | GCTGGCTTGATTGAGTGTGG    |
| <i>CTSD</i>              | F | CCACACACACCCACACTC      |
| <i>CTSD</i>              | R | GGGGAAAACCACAGAACAAAAC  |
| <i>ASAH1</i>             | F | GGCCCCAGCCTACTTTATCC    |
| <i>ASAH1</i>             | R | ACCACATACCATCTACCCTGCTT |
| V-ATPase (Human)         |   |                         |
| <i>ATP6V1B1</i>          | F | AGGACTGTGTGCAGCGTGA     |
| <i>ATP6V1B1</i>          | R | TCTGGGAGGGTGAAGTGGA     |
| Internal control (Human) |   |                         |
| <i>GAPDH</i>             | F | GCAAGAGCACAAAGGAAGAGAG  |
| <i>GAPDH</i>             | R | GAGGGGAGATTCAAGTGTGGTG  |
| <i>18S rRNA</i>          | F | CAACACGGGAAACCTCACC     |
| <i>18S rRNA</i>          | R | TGTGTGACTTGGGAGAGGA     |

GAA: alpha glucosidase, CTSS: cathepsin S, ARSA: arylsulfatase A, TPP1: tripeptidyl peptidase 1, FUCA1: alpha-L-fucosidase 1, MAN2B2: mannosidase alpha class 2B member 2, CTSD: cathepsin D, ASAH1: N-acylsphingosine amidohydrolase 1, ATP6V1B1: ATPase H<sup>+</sup> transporting V1 subunit B1, GAPDH: glyceraldehyde-3-phosphate dehydrogenase
